# Supplementary material
Source: publisher figshare collection journal article supplement (https://gsajournals.figshare.com/ndownloader/files/22342050)
Supplement: Supplementary file 1 [file 22342050]

**Tables**

| **Primer** | **Sequences (5’ to 3’)** |
| --- | --- |
| ac1 (aka Ac120r) | CCCGTTTCCGTTCCGTTTTCGT |
| ac2 (aka Ac4436f) | GATTACCGTATTTATCCCGTTCGTTTTC |
| ac3 | TGCCATCTTCCACTCCTCGGCTTTAG |
| ac4 | GCTGTTGTGTCATTTGTGTGCTGTCCA |
| ac6 | CTTGTTCCTTGATGACCCTCAGCCC |
| ac7 | GTTTCTGTGAGATAAAGG ATTTGATTGACC |
| ac8 | AGTCTGCGTTCAGTGCTG GTGGTCGTGTTG |
| ac9 | TCATGGAGAGGAGCC ACTTGCTACATCTTC |
| ac10 | GCACAAAAGATTGGGTAGCAG |
| ac11 | TTCTATTGCGTCTTCATCC |
| ac12 | TCCGCCCATCCGCCATCCGCCATCTG |
| ac13 | AGTCTGCGTTCAGTGCTGGTGGTCGTGTTG |
| ac14 | TCATGGAGAGGAGCCACTTGCTACATCTTC |
| Ac264r | AATACGGTAACGAAACGGAATCATC |
| Ac1568r | TCCATCCACCTCCACTTCAGTTTCCTTC |
| f1(1) | CCGATCAGCAGGTGTGGGAAGCTA |
| f1(2) | AGAAACGGAGGGAGTATCTCT CTTGGCG |
| f4(1) | GTTGGGCTGGCAAAATTCCATCTCC |
| f4(2) | CTCCTCCCTCCCCTCGCCCCT |
| P1(fAc) (aka P1-15588f) | GCTATCAAACAGGACACGGGAGAGAAT |
| p1(9d) | CGCAACACCATGTGGGTTGTAGTCAGG |
| pp1’ | GACCGTGACCTGTCCGCTC |
| Ubi-f | GTCATAGTTCTGGGTAGTACGC |
| Ubi-r | TGGAGGTTGTCAAAGTATCTGC |
| 1tgf (aka 70849f) | GCACGAGAGATCAGACGCCAGCAGC |
| 4tgr | GGTGGTCTTTCCATGGTGTGTGG |

**Table S1.** Oligonucleotide primer sequences used in PCR experiments.

|  | **Crosses** | **coarsely spotted** | **fine spotted** | **no spots** | **total seeds** |
| --- | --- | --- | --- | --- | --- |
| 1 | *p1-vv-9D9A/p1-wr* x *p1-ww; r1-m3::Ds* (*Ac* tester) | 112 | 0 | 121 | 233 |
| 2 | *p1-ww; r1-m3::Ds* (*Ac* tester)x *p1-ww-id1/p1-wr* | 4 | 38 | 97 | 139 |
| 3 | *p1-ww; r1-m3::Ds* (*Ac* tester)x *p1-ww-id4/p1-wr* | 0 | 0 | 197 | 197 |
| 4 | *p1-vv-9D9A/p1-wr* x *p1-ww-id1/p1-wr; r1-m3::Ds* | 11 | 5 | 82 | 98 |
| 5 | *p1-vv-9D9A/p1-wr* x *p1-ww-id4/p1-wr; r1-m3::Ds* | 4 | 0 | 18 | 22 |
| 6 | *p1-ww; r1-m3::Ds* (*Ac* tester)x *p1-vv-9D9A/p1-ww-id1; r1-m3::Ds* | 0 | 16 | 24 | 40 |
| 7 | *p1-ww; r1-m3::Ds* (*Ac* tester) x *p1-vv-9D9A*/p1-ww; r1-m3::Ds* † | 0 | 64 | 224 | 288 |
| 8 | *p1-ww; r1-m3::Ds* (*Ac* tester)x *p1-vv-9D9A/p1-ww-id4; r1-m3::Ds* | 34 | 21 | 105 | 160 |
| 9 | *p1-ww; r1-m3::Ds* (*Ac* tester) x *p1-vv-9D9A*/ p1-ww; r1-m3::Ds* **§** | 52 | 5 | 87 | 144 |

**Table S2.** Kernel counts from the cobs of the indicated crosses.

*p1-vv-9D9A** was segregated from *p1-vv-9D9A/p1-ww-id.*

†In this cross, *p1-vv-9D9A** was segregated from *p1-vv-9D9A/p1-ww-id1.*

**§** In this cross, *p1-vv-9D9A** was segregated from *p1-vv-9D9A/p1-ww-id4*

| ***p1-ww-id4* shoot** | **stem** | **loop** |
| --- | --- | --- |
| 21nt | 1519 | 1705 |
| 22nt | 5184 | 4269 |
| **21nt/22nt ratio** | **0.29** | **0.40** |
|  |  |  |
| ***p1-ww-id4* root** | **stem** | **loop** |
| 21nt | 933 | 861 |
| 22nt | 4027 | 3496 |
| **21nt/22nt ratio** | **0.23** | **0.25** |

**Table S3.** 21 and 22nt small RNA read counts in the stem and loop region of dsRNA in *p1-ww-id4*. Chi-squared test *p* < 0.01 in shoot and *p* =0.24 in root.
